# Supplementary material
Source: Springer Nature journal article supplement (https://www.springermedizin.de/resource/supplementary/12936_2013_2745_MOESM7_ESM.pdf/9544176)
Supplement: MOESM7 [file 9544176]

| <b>Country</b>              | <b>Elimination date</b>                     |
|-----------------------------|---------------------------------------------|
| Andorra                     | 1945-1970                                   |
| Anguilla                    | malaria free, no dates of elimination given |
| Antigua                     | malaria free, no dates of elimination given |
| Aruba                       | malaria free, no dates of elimination given |
| Australia                   | 1986                                        |
| Austria                     | 1951                                        |
| Bahamas                     | malaria free, no dates of elimination given |
| Bahrain                     | 1979                                        |
| Barbados                    | malaria free, no dates of elimination given |
| Belarus                     | 1970-1990                                   |
| Belgium                     | 1945-1970                                   |
| Bermuda                     | malaria free, no dates of elimination given |
| Bosnia and Herzegovina      | 1945-1970                                   |
| Brunei Darussalam           | 1987                                        |
| Bulgaria                    | 1965                                        |
| Canada                      | 1950                                        |
| Cayman Islands              | malaria free, no dates of elimination given |
| Chile                       | 1975                                        |
| China (Taiwan)              | 1965                                        |
| Croatia                     | 1956-1970                                   |
| Cuba                        | 1967                                        |
| Cyprus                      | 1953                                        |
| Czech Republic              | 1953                                        |
| Denmark                     | 1950                                        |
| Dominica                    | Between 1965-1967                           |
| Estonia                     | 1952                                        |
| Falkland Islands (Malvinas) | pre-1900                                    |
| Faroe Islands               | pre-1900                                    |
| Finland                     | 1952                                        |
| France                      | 1952                                        |
| French Polynesia            | pre-1900                                    |
| Gaza Strip                  | 1965                                        |
| Germany                     | 1951                                        |
| Greece                      | 1945-1970                                   |
| Greenland                   | pre-1900                                    |
| Grenada                     | Between 1961-1963                           |
| Guadeloupe                  | malaria free, no dates of elimination given |
| Hong Kong                   | 1945-1970                                   |
| Hungary                     | 1963                                        |
| Iceland                     | pre-1900                                    |
| Ireland                     |                                             |
| Italy                       | Between 1967_1970                           |

|                          |                                             |
|--------------------------|---------------------------------------------|
| Jamaica                  | 1958                                        |
| Japan                    | 1950                                        |
| Jordan                   | 1970                                        |
| Kazakhstan               | 2000                                        |
| Korea, South             | 1990-2008                                   |
| Kuwait                   | no cases since 1979                         |
| Latvia                   | 1952                                        |
| Lebanon                  | 1963                                        |
| Lesotho                  | Originally malaria free                     |
| Libya                    | 1973                                        |
| Lithuania                | 1952                                        |
| Luxembourg               | 1945-1970                                   |
| Maldives                 | malaria free, no dates of elimination given |
| Martinique               | malaria free, no dates of elimination given |
| Mauritius                | 1963                                        |
| Moldova, Republic of     | 1970-1990                                   |
| Monaco                   | 1945-1970                                   |
| Mongolia                 | pre-1900                                    |
| Montserrat               | malaria free, no dates of elimination given |
| Morocco                  | 2005                                        |
| Netherlands              | 1967-1970                                   |
| New Zealand              | pre-1900                                    |
| Norway                   | pre-1900                                    |
| Oman                     | 2004                                        |
| Philippines              | 2006                                        |
| Poland                   | 1965-1967                                   |
| Portugal                 | 1973                                        |
| Puerto Rico              | 1962                                        |
| Qatar                    | 1970                                        |
| Reunion                  | 1979                                        |
| Romania                  | 1967                                        |
| Russia                   | 1970-1990                                   |
| Saint Lucia              | 1961-1963                                   |
| San Marino               | 1945-1970                                   |
| Serbia and Montenegro    | 1945-1970                                   |
| Seychelles               | malaria free, no dates of elimination given |
| Singapore                | 1986                                        |
| Slovakia                 | 1953                                        |
| Slovenia                 | 1945-1970                                   |
| Spain                    | 1964                                        |
| St. Kitts & Nevis        | malaria free, no dates of elimination given |
| St. Vincent & Grenadines | malaria free, no dates of elimination given |
| Svalbard and Jan Mayen   | Originally malaria free                     |

|                              |                                                     |
|------------------------------|-----------------------------------------------------|
| Islands                      |                                                     |
| Sweden                       | pre-1900                                            |
| Switzerland                  | pre-1900                                            |
| Syrian Arab Republic         | 2005                                                |
| The former Yugoslav Republic | Post WWII                                           |
| Trinidad and Tobago          | 1965 (malaria returned, but eliminated again later) |
| Tunisia                      | 1979                                                |
| Turks & Caicos Islands       | malaria free, no dates of elimination given         |
| U.K. of Great Britain and N  | 1952                                                |
| Ukraine                      | 1970-1990                                           |
| United Arab Emirates         | 1990-2008                                           |
| United States of America     | 1951                                                |
| Uruguay                      | Pre-1900                                            |
| West Bank                    | 1965                                                |

*Dates of malaria elimination for those countries that achieved it. Historical literature, review papers and personal communications were collated to create a combined record of the dates that malaria elimination was achieved for each country.*
